# Supplementary material for: TiO2 nanoparticle interactions with supported lipid membranes – an example of removal of membrane patches
Source: Royal Society of Chemistry journal article supplement (doi:10.1039/c6ra05693h), 2016-01-01
Supplement: c6ra05693h1.pdf [file c6ra05693h1.pdf]

# TiO<sub>2</sub> nanoparticle interactions with supported lipid membranes

## – an example of removal of membrane patches

*Fang Zhao,<sup>1</sup> Jenny Perez Holmberg,<sup>2</sup> Zareen Abbas,<sup>2</sup> Rickard Frost,<sup>1</sup> Tora Sirkka,<sup>1</sup> Bengt Kasemo,<sup>1</sup>  
Martin Hassellöv,<sup>3</sup> and Sofia Svedhem<sup>1,\*</sup>*

<sup>1</sup> Dept. of Applied Physics, Chalmers University of Technology, SE-412 96 Göteborg, Sweden

<sup>2</sup> Dept. of Chemistry and Molecular Biology, University of Gothenburg, SE-412 96 Göteborg, Sweden

<sup>3</sup> Dept. of Marine Sciences, University of Gothenburg, SE-40530 Göteborg, Sweden

\*sofia.svedhem@chalmers.se

### Supporting Information.

#### MATERIALS AND METHODS

*Combined QCM-D and reflectometry measurements.* Combined QCM-D and reflectometry measurements were performed in flow mode using a prototype instrument.<sup>1</sup> Gold-coated QCM-D sensor crystals (Q-Sense AB, Sweden) were modified to meet the requirement for sensitive reflectometry measurements by deposition of a 100 nm layer of Ti followed by a 110 nm layer of SiO<sub>2</sub> onto the sensor surface. Prior to the experiment, the crystals were cleaned as for ordinary QCM-D measurements, and the experiments were performed similarly. The detection of mass adsorbed to the sensor surface in optical reflectometry is based on changes in the reflectivity of a solid surface when material adsorbs to

it. The measured optical signal,  $\Delta R$ , is the relative change of the intensity ratio of the two polarizations of the reflected light, which is different from ellipsometry in that the phase shift of the reflected light is not taken into account. By optical modeling,  $\Delta R$  can be related to the thickness  $d$  and the refractive index  $n$  of the material adsorbed to the sensor surface relative to the surrounding buffer ( $n_0$ ) via:<sup>2</sup>

$$\Delta R = d (n - n_0) A$$

where  $A$  is a sensitivity factor dependent on the optical setup.

## RESULTS AND DISCUSSION

*Combined QCM-D and reflectometry results confirms bilayer removal.* By combining QCM-D and optical reflectometry measurements in a novel experimental setup,<sup>1</sup> the QCM-D data and optical data are obtained simultaneous on the same surface. As opposed to QCM-D, which measures acoustically coupled mass (here adsorbed lipid and NP mass, as well as solvent associated with it), reflectometry measures changes in refractive index near the surface due to adsorption of material on the sensor surface. The optical result is given as  $\Delta R$ .

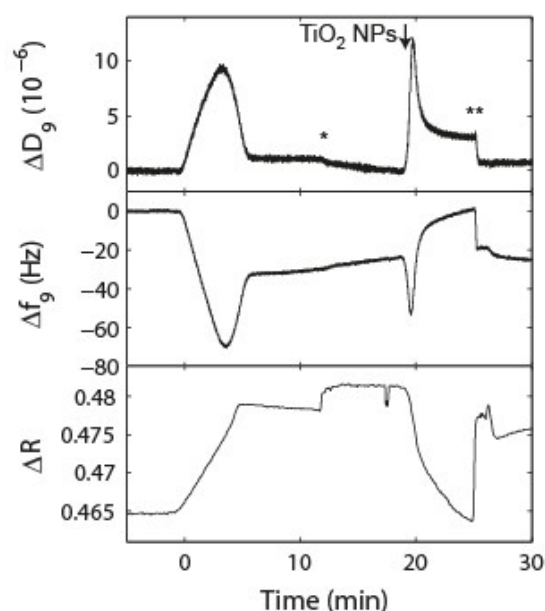

**Figure S1** QCM-D frequency and dissipation shifts ( $\Delta f$  and  $\Delta D$ , respectively) and reflectometry data ( $\Delta R$ ) for the interaction between  $\text{TiO}_2$  NPs and a POPG/POPC (1:1) membrane. These complementary results were collected simultaneously in a combined QCM-D and reflectometry setup. The lipid membrane formation (in TRIS-NaCl- $\text{CaCl}_2$ ) is followed by a buffer change to TRIS (indicated by \*), the addition of  $\text{TiO}_2$  NPs in TRIS, and a buffer change to TRIS-NaCl- $\text{CaCl}_2$  (indicated by \*\*).

As shown in Figure S1, the scenario of  $\text{Ca}^{2+}$  mediated membrane damage induced in PG-containing membranes upon exposure to  $\text{TiO}_2$  NPs was confirmed in experiments with optical detection of the mass at the sensor during the QCM-D experiment. The same experimental set up has been used before to characterize different supported lipid membrane systems, while performing reflectometry and QCM-D was performed simultaneously on the same surface. This is a particularly powerful combination when it comes to differentiate between different mechanisms for formation of the supported lipid membranes. QCM curves show similar behavior as described above. For membrane formation, the signal of reflectometry first increases and then levels off, which is consistent with previous reports.<sup>3</sup> After introducing  $\text{TiO}_2$  NPs, reflectometry curve initially shows sharp drop in signal and stabilizes at almost the same value of baseline prior to membrane formation. This indicates a big loss in the optical mass (or dry mass) of lipid membrane due to  $\text{TiO}_2$  addition. However, the signal almost goes back after rinsing with Tris-NaCl- $\text{CaCl}_2$  buffer, namely, the membrane returns to the substrate again but with some lipid patches removed during the interaction with  $\text{TiO}_2$  NPs. Thus, the results from the combined QCM-D and optical setup further supports our assumption.

*Two control experiments supporting the  $\text{Ca}^{2+}$ -ions mediated mechanism.* Control experiments by QCM-D, where EDTA was added instead of  $\text{TiO}_2$  NPs, are shown in Figure S2. In A it is shown that the re-exposure of the membrane to more  $\text{Ca}^{2+}$  ions is required for  $\text{TiO}_2$  particles to bind when added again to the lipid membrane, and in B, it is shown that EDTA, a high-affinity  $\text{Ca}^{2+}$  chelator, has a similar effect

on the membrane as the TiO<sub>2</sub> NPs. In yet another series of experiments, Mg<sup>2+</sup> ions were found to have a similar effect as Ca<sup>2+</sup> (not shown).

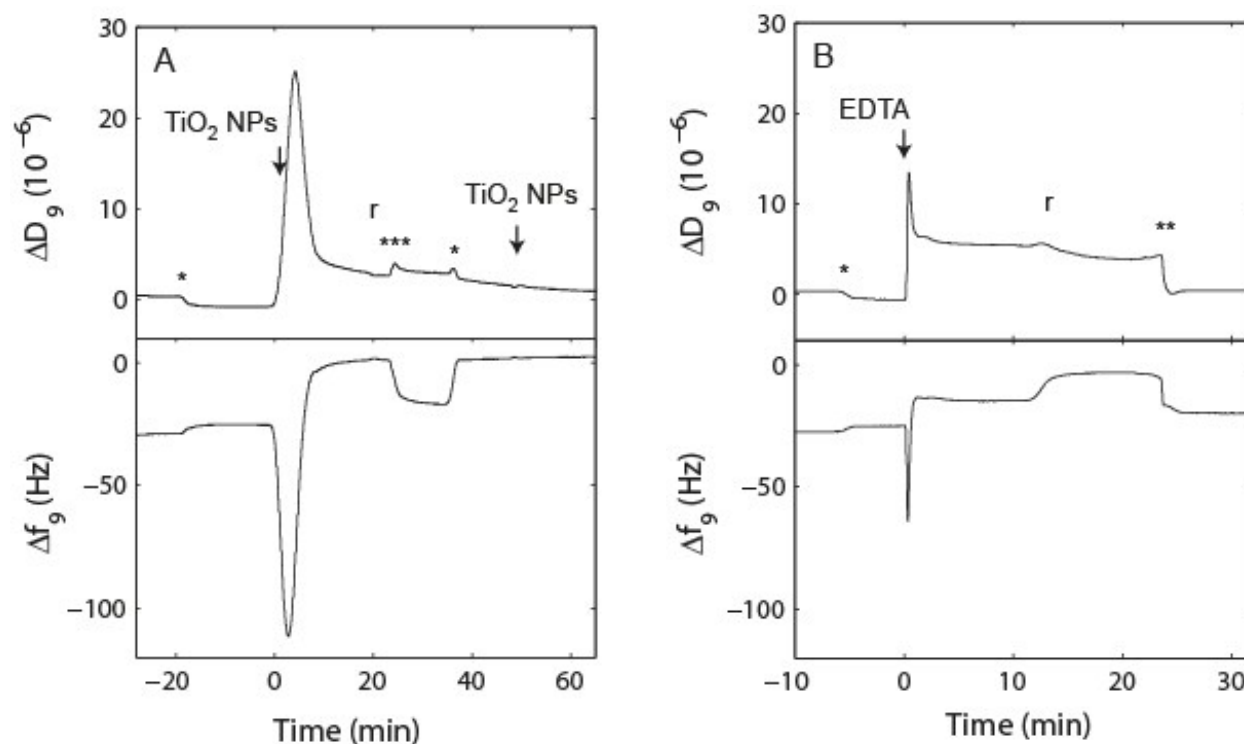

**Figure S2** QCM-D control experiments (frequency and dissipation shifts;  $\Delta f$  and  $\Delta D$ , respectively) with the POPC/POPG 1:1 membrane, to which (A) TiO<sub>2</sub> NPs were added twice to the membrane while rinsing only with a non-Ca<sup>2+</sup> containing buffer (TRIS-NaCl) in between, or (B) EDTA was added instead of TiO<sub>2</sub> NPs. In both cases, the lipid membrane formation (in TRIS-NaCl-CaCl<sub>2</sub>) is followed by a buffer change to TRIS (\*) before the addition of TiO<sub>2</sub> NPs or EDTA in TRIS.

### *DLVO results*

In the DLVO theory the total interaction energy is calculated as the sum of electrostatic and van der Waals energies. The electrostatic interactions are described by a screened Coulomb potential whereas the van der Waals interaction is usually obtained by using the Hamaker theory.<sup>4</sup>

We used a sphere-plate interaction model to describe the interaction between a TiO<sub>2</sub> particle and a silica surface with a lipid bilayer. The size of the sphere was set to the average hydrodynamic size of the

TiO<sub>2</sub> NPs (57 nm, see Table 1). Zeta potential values for TiO<sub>2</sub> NPs (measured, see Table 1) and the supported lipid membrane (estimated by the corresponding value obtained for liposomes in bulk, see Table 1) were used to obtain the interaction energies between TiO<sub>2</sub> NPs and the lipid membrane, as suggested by Hogg *et al.*<sup>5</sup> The van der Waals energies were calculated by using an expression which takes into account the retardation effects.<sup>6</sup> The retardation effects were found to be necessary when considering attractive interactions between two bodies at distances larger than few nanometers. The value of  $1 \times 10^{-20}$  J was used for TiO<sub>2</sub>-water-silica system.

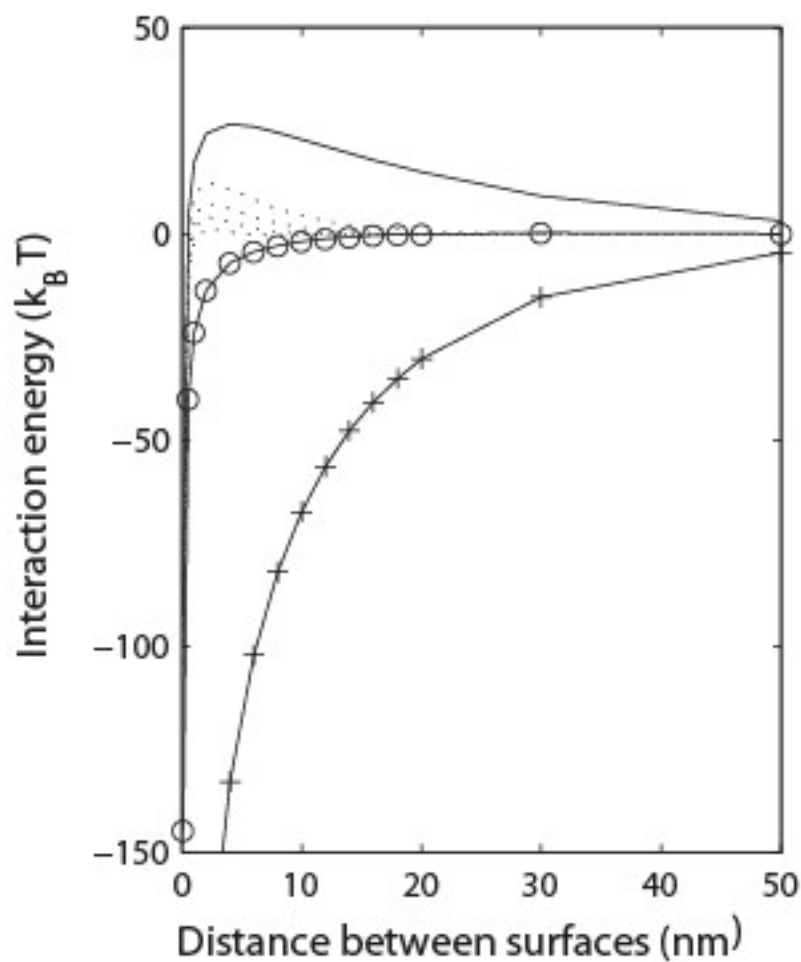

**Figure S3** Total interaction energy between a planar lipid membrane and TiO<sub>2</sub> NPs obtained by DLVO theory using the experimental conditions given in Table 1. Solid lines represent surface zeta potentials

of POPC (o), POPC-POEPC (1:1) (+), and POPC-POPG (1:1) (no symbol) membranes in 10 mM TRIS, and dotted lines represent POPC-POPG (1:1) membranes in 10 mM TRIS +  $r$  mM  $\text{CaCl}_2$  ( $r = 1, 2, 4,$  and 8), where higher  $\text{CaCl}_2$  concentrations leads to lower interaction energies.

The interaction energy profiles show that the interaction between the positively charged bilayers and negatively charged  $\text{TiO}_2$  NPs is attractive. As expected, and in accordance with our experimental results, the attractive interaction increases as the positive charge on the membrane increases, e.g, the POPC/POEPC 1:1 membrane has highest positive charge and shows the strongest attractive interaction, which is well consistent with our experimental results (Figure 1A). On the other hand the strongly negatively charged membrane POPC/POPG 1:1 shows strongest repulsion. More weakly negatively charged bilayer (zeta potential -13 mV) formed by POPC/POPG 1:1 in the presence of  $\text{CaCl}_2$  shows slightly repulsive interaction energies. In contrast, our experimental results show that  $\text{TiO}_2$  NPs adsorb on these bilayers. We note that the zeta potential is measured for liposomes in solution and it may not correctly represent the zeta potential of bilayers, due to geometric reasons as well as due to potential asymmetries in the distribution of lipids between the two membrane leaflets. For example, it is likely that the highly negatively charged  $\text{SiO}_2$  surface attracts  $\text{Ca}^{2+}$  ions which results in high concentrations of  $\text{Ca}^{2+}$  ions at the interface between the substrate and the lipid bilayer. The increased  $\text{Ca}^{2+}$  concentration in the membrane will induce strong screening of the negatively charged groups on lipids and this will result in a zeta potential of the supported membrane which is much lower than for the liposome in bulk solution. DLVO calculations show that a zeta potential of -5 mV on the membrane will lead to an energy barrier of  $0.3 k_B T$ , and at a -2 mV potential, the attraction is purely attractive (Supporting Information, Figure S3).

DLVO calculations show that a zeta potential of -5mV on the membrane will lead to an energy barrier of  $0.3 k_B T$ , and at a -2 mV potential, the attraction is purely attractive.

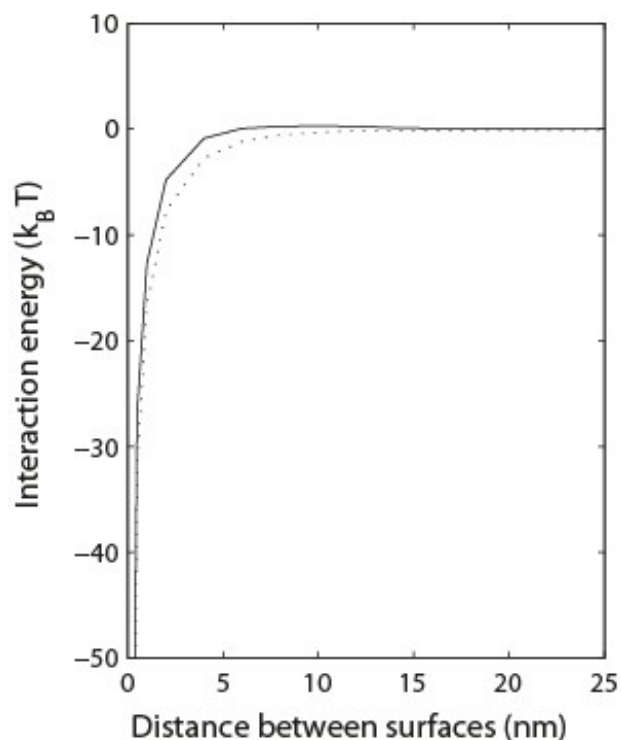

**Figure S4** Total interaction energy between a planar lipid membrane and TiO<sub>2</sub> NPs in 10 mM TRIS buffer obtained by applying DLVO theory. The interaction energies are calculated by considering -27 mV zeta potential on the particle surface, while assuming -5 mV and -2 mV on the membrane (solid and dotted lines, respectively).

#### References:

1. Wang, G.; Rodahl, M.; Edvardsson, M.; Svedhem, S.; Ohlsson, G.; Höök, F.; Kasemo, B., A combined reflectometry and quartz crystal microbalance with dissipation setup for surface interaction studies. *Rev. Sci. Instrum.* **2008**, *79*, 075107.
2. Dijt, J. C.; Stuart, M. A. C.; Fleer, G., *Adv. Colloid Interface Sci.* **1994**, *50*, 79-101.
3. Edvardsson, M.; Svedhem, S.; Wang, G.; Richter, R.; Rodahl, M.; Kasemo, B., QCM-D and Reflectometry Instrument: Applications to Supported Lipid Structures and Their Biomolecular Interactions. *Anal. Chem.* **2009**, *81*, 349-361.
4. Verwey, E. J. W. O., J.T.G., *Theory of the stability of lyophobic colloids*. Elsevier: New York, 1948.
5. Hogg, R.; Healy, T. W.; Fuersten.Dw, Mutual Coagulation of Colloidal Dispersions. *T Faraday Soc* **1966**, *62* (522p), 1638-&.
6. Gregory, J., Approximate Expressions for Retarded Vanderwaals Interaction. *J Colloid Interf Sci* **1981**, *83* (1), 138-145.
